# Supplementary material
Source: MDPI journal article supplement (https://www.mdpi.com/2504-477X/3/2/39)
Supplement: s1 [file s1]

# Supplementary Materials: pH-Triggered Interfacial Interaction of Kaolinite/Chitosan Nanocomposites with Anionic Azo Dye

Shaikat Chandra Dey, Mokrema Moztahida, Mithun Sarker, Md. Ashaduzzaman and Sayed Md. Shamsuddin

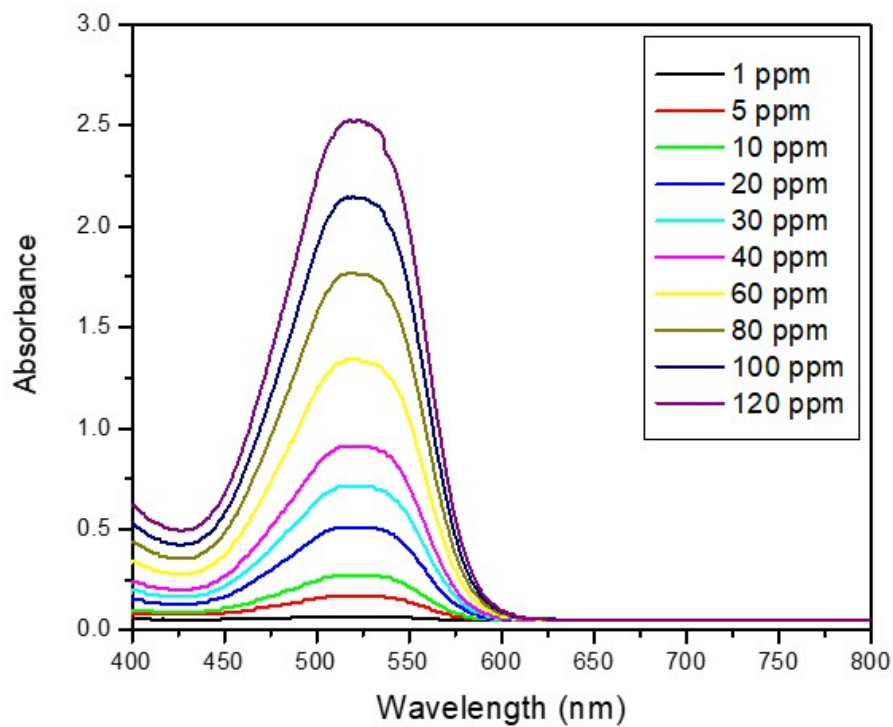

Figure S1. Visible spectra for aqueous solutions of Remazol Red (RR).

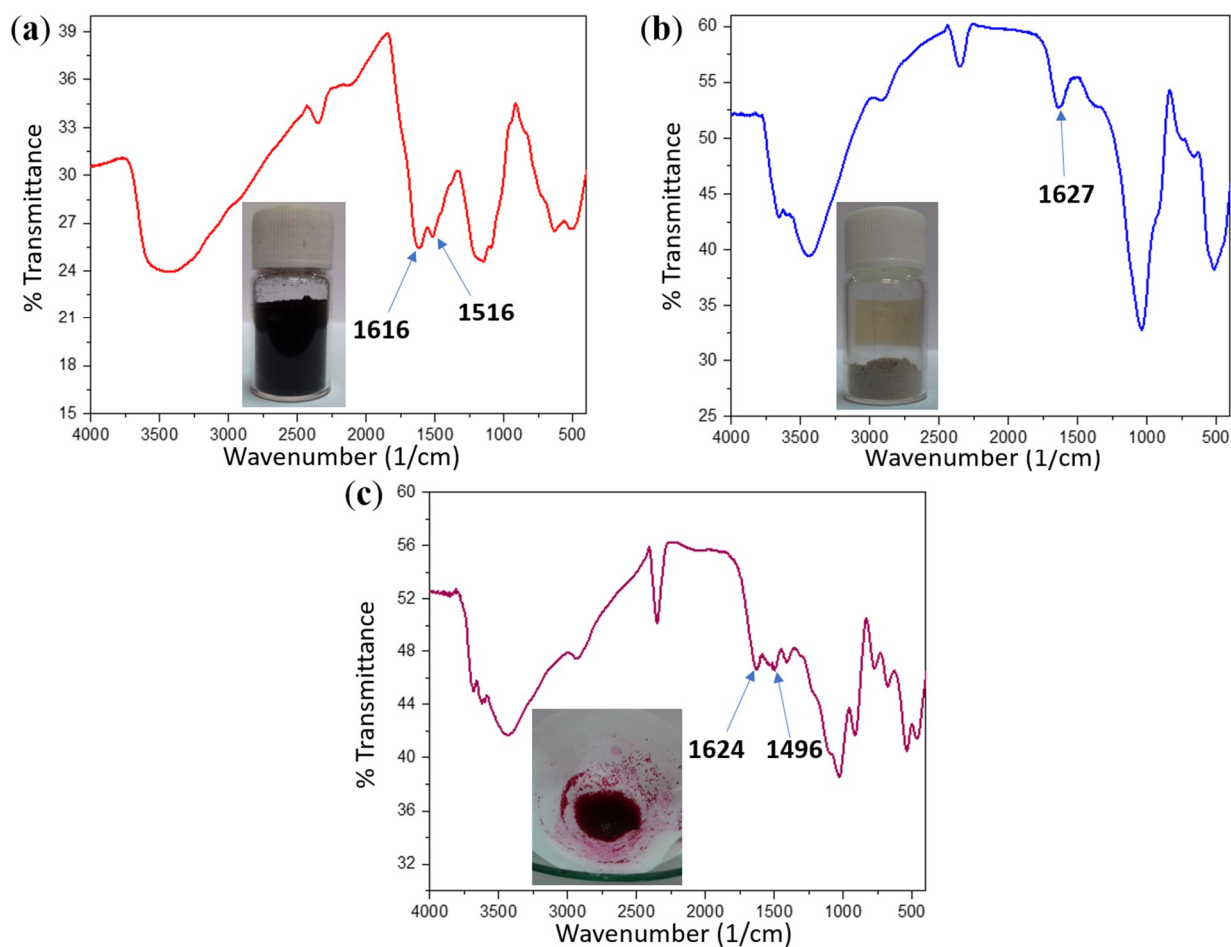

**Figure S2.** FTIR spectrum of (a) RR, (b) NK<sub>80</sub>C<sub>20</sub>, and (c) RR loaded NK<sub>80</sub>C<sub>20</sub>. Insets show photographs of the respective materials. The shifting of characteristic absorption bands strongly supports the interfacial electrostatic interaction between positively charged NK<sub>80</sub>C<sub>20</sub> and anionic RR. Dye-loaded adsorbents were successfully isolated from the aqueous solution via filtration.

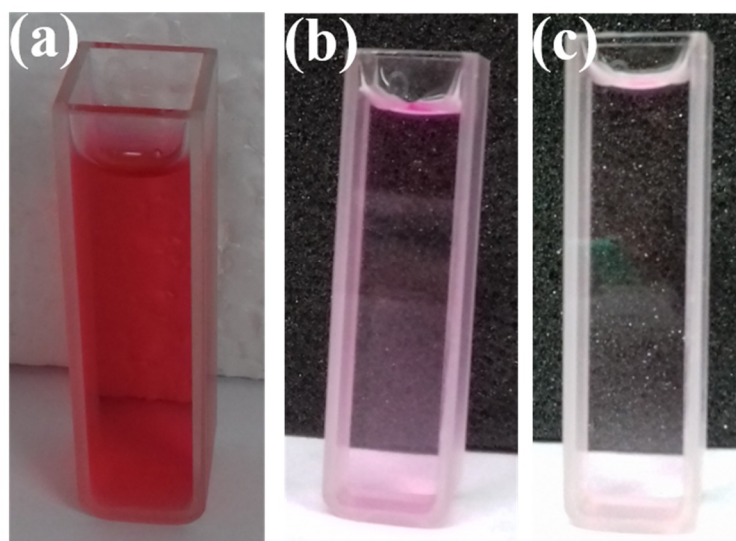

**Figure S3.** Image of (a) RR solution before adsorption, (b) RR solution after adsorption by Chitosan, and (c) RR solution after adsorption by NK<sub>80</sub>C<sub>20</sub>.
